# Supplementary material
Source: PubMed Central journal article supplement (PMC4311213)
Supplement: supp_tpc.114.133496_tpc133496_SupplementalData.pdf [file supp_tpc.114.133496_tpc133496_SupplementalData.pdf]

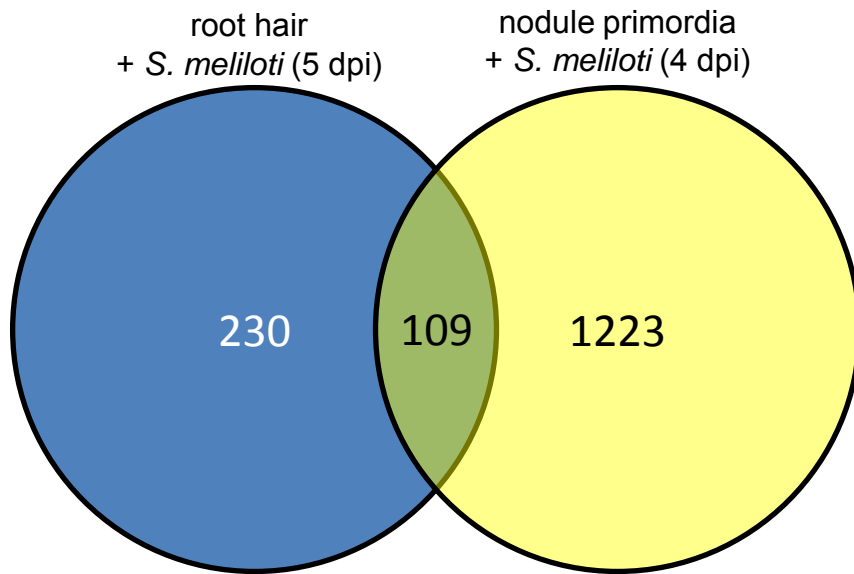

**Supplemental Figure 1.** Differentially Expressed Genes ( $p < 0.05$ ) in WT Plants Infected by Sm1021.

Left circle: numbers of genes significantly induced in root hairs harvested from WT plants 5 dpi with *S. meliloti*; right circle: genes induced in *S. meliloti* induced nodule primordia (MtGEA).

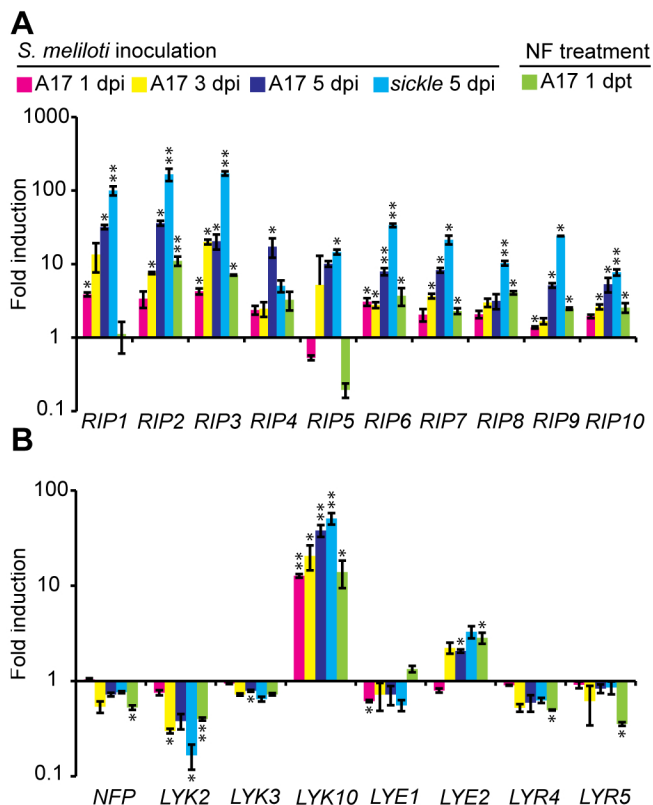

**Supplemental Figure 2.** Regulation of Genes Encoding Peroxidases and LYSM Proteins During Infection.

**(A)** Induction of Peroxidases (*RIPs*) in *M. truncatula* WT and *skl* mutant following inoculation with *S. meliloti* 1021 based on microarray data.

**(B)** Altered expression of LysM domain-containing proteins including: LYSM-receptor-like kinases (LYK), LYK-related (LYR) and LYE.

Significant inductions relative to control experiments are shown (\*  $P < 0.05$ , \*\*  $P < 0.01$ ). Error bars = SEM ( $n=3$ ).

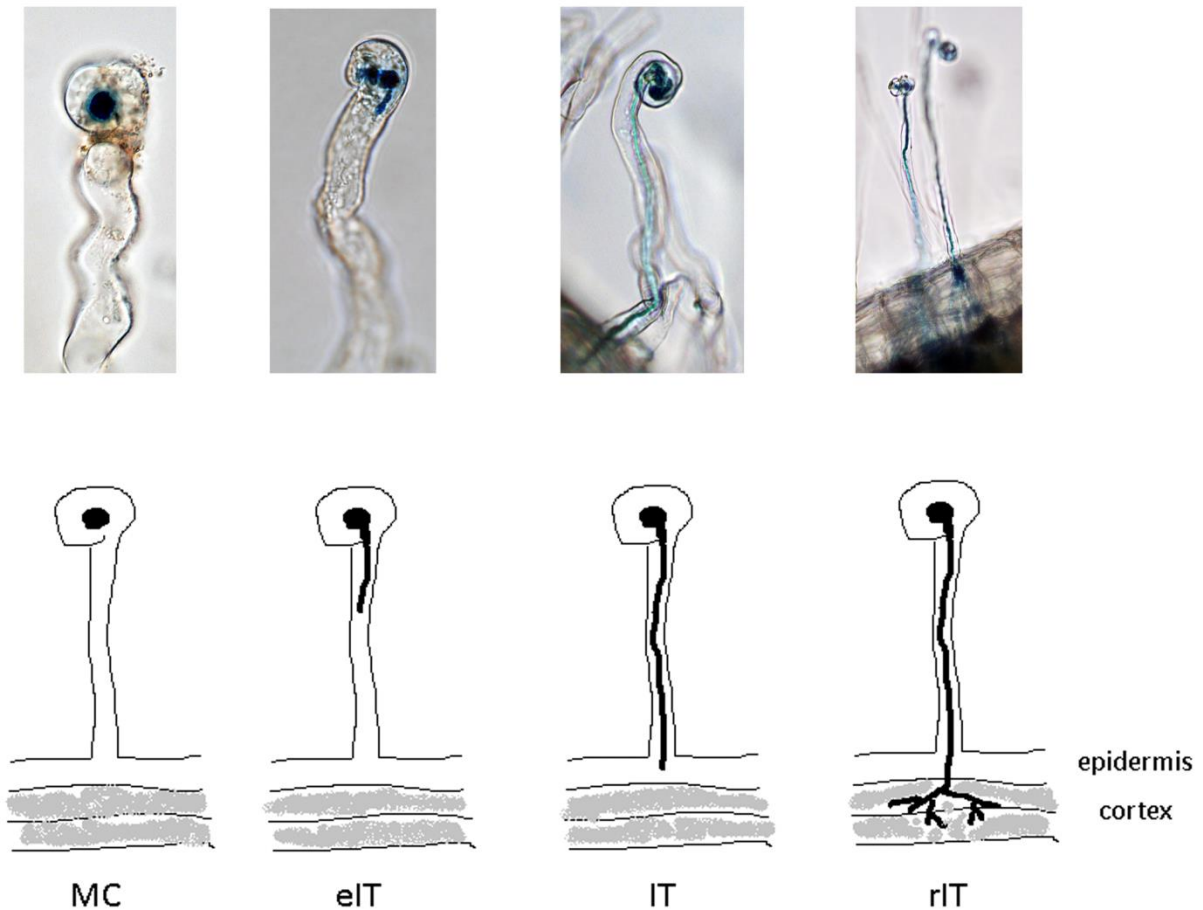

**Supplemental Figure 3.** Depiction of four categories of infection events which were used to characterize the infection phenotype of *mtarf16* mutants

Upper panel: the four categories of infection events as shown by lacZ staining of *S. meliloti* (blue color). Bottom panel: Cartoon simplification of the four categories corresponding to the upper panels. Bold line indicates microcolony (MC) or infection threads (IT). Cortical cell layers were filled with grey. eIT, elongating infection thread. rIT, ramified infection thread.

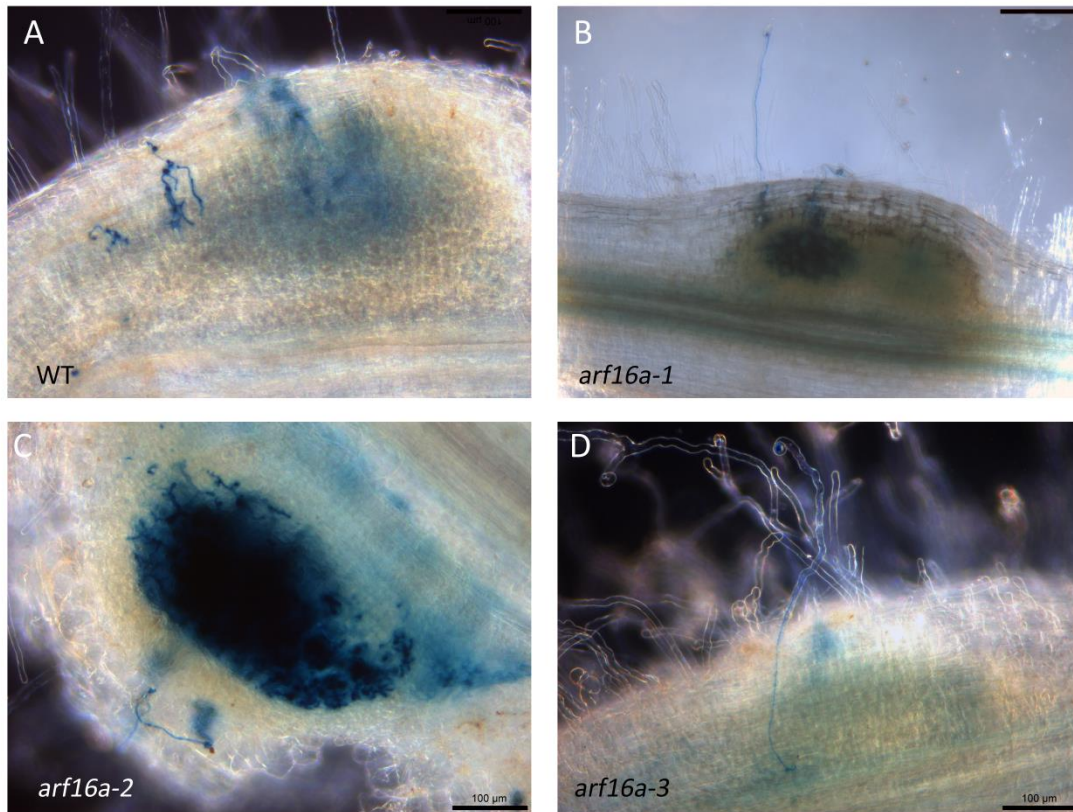

**Supplemental Figure 4.** Infection threads and nodule primordia from WT (R108) and *arf16a* mutants.

Some typical infection threads and/or nodule primordia from 7 dpi plants are shown.

Blue colour indicates lacZ staining of *S. meliloti* 1021. Bar = 100 μm (A, C and D) or 200 μm (B).

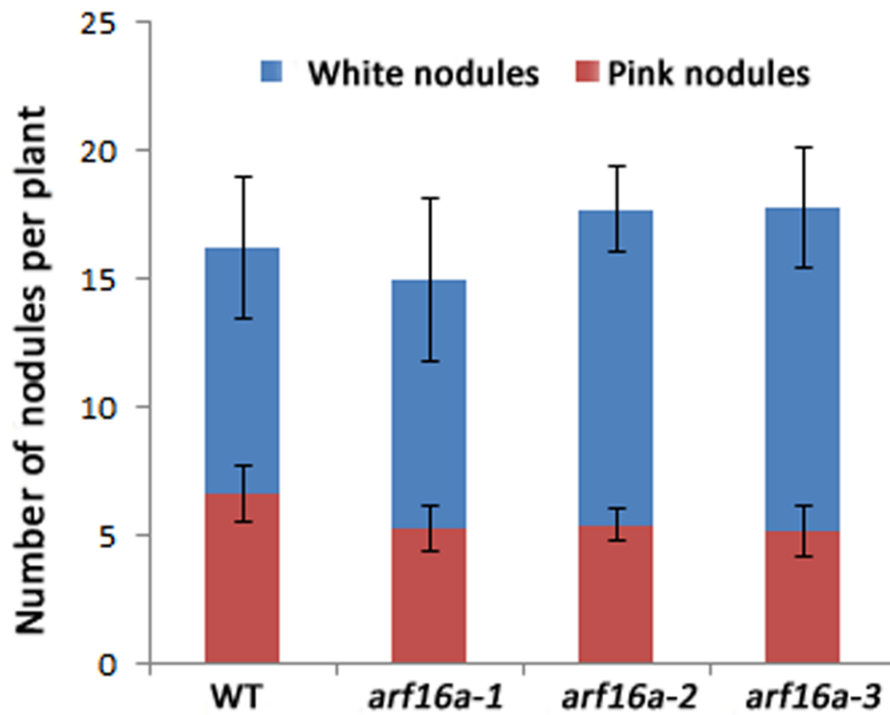

**Supplemental Figure 5.** Nodule numbers of *arf16a* mutants are not different from WT.

There were no significance differences in mean total nodule numbers between WT (R108) and *arf16a* alleles at 21dpi. ( $P > 0.05$ , two-tailed Student's T-test). Error bar indicates standard error.

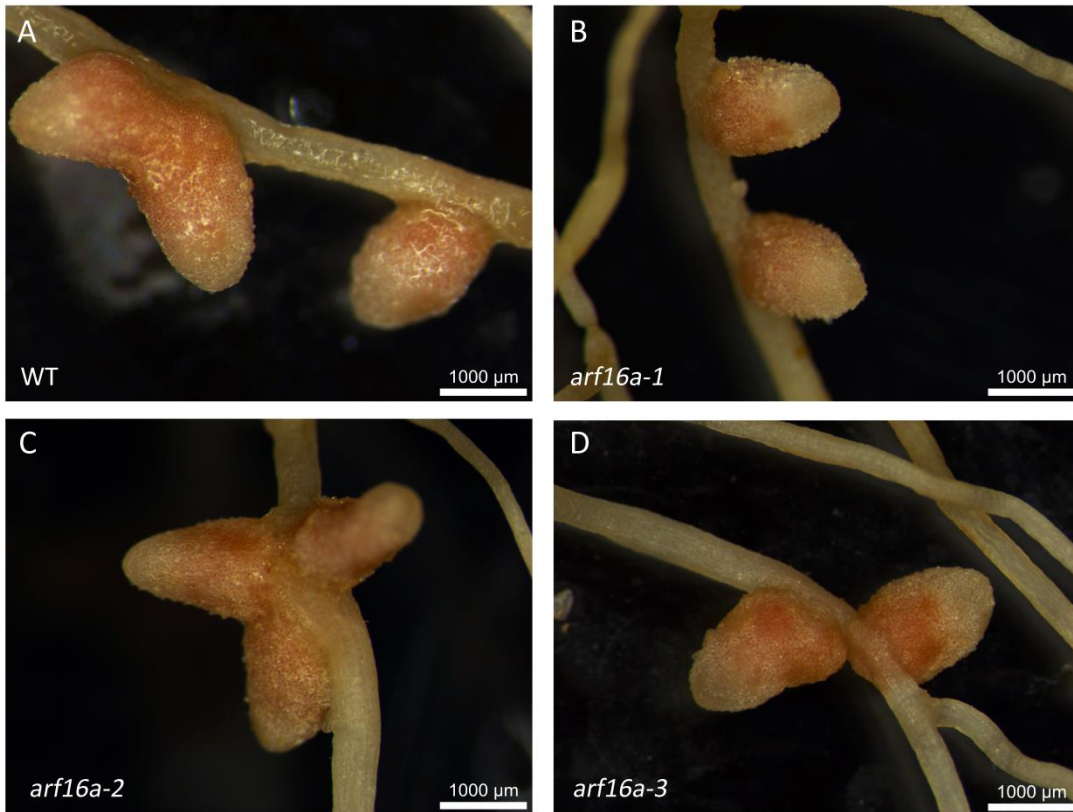

**Supplemental Figure 6.** Nodules of *arf16a* mutants have normal morphology. Nodule phenotype of WT (R108) and *arf16a* mutants at 21dpi. Bar = 1000 µm.

| <b>Supplemental Table 1. Primers used in this study</b> |               |                     |                                                          |
|---------------------------------------------------------|---------------|---------------------|----------------------------------------------------------|
| <b>Gene</b>                                             | <b>Model</b>  | <b>Primer name</b>  | <b>Primer sequence</b>                                   |
| <b>Genes of Interest</b>                                |               |                     |                                                          |
| <i>SAUR1</i>                                            | Medtr8g094980 | SAUR1-F             | TGGTCCTCTCAAGCTTCCTT                                     |
|                                                         |               | SAUR1-R             | TGGTGATGATAGGGTGTGGA                                     |
| <i>GH3.1</i>                                            | Medtr5g016320 | GH3.1-F             | CTCAGAGTTTCTGACCAGTTCAG                                  |
|                                                         |               | GH3.1-R             | AGTAGGCTGTACAATAACTGACGAC                                |
| <i>ARF16</i>                                            | Medtr1g094960 | ARF16-F             | GCGCCTTCTTCAGGTAGTGT                                     |
|                                                         |               | ARF16-R             | AGGTGTGAATGGTGAGAGATTG                                   |
| <i>IAA9</i>                                             | Medtr8g067530 | IAA9-F              | TGCTCATCGGTTGACAGTTC                                     |
|                                                         |               | IAA9-R              | CTTTCAGGCGACTGAGATCC                                     |
| <i>D27</i>                                              | Medtr1g471050 | D27-F               | TCAAGCAGCAACAGGAATCAG                                    |
|                                                         |               | D27-R               | AAATTTCTGTGAAGCCACGGTAG                                  |
| <i>CCD8</i>                                             | Medtr3g109610 | CCD8-F              | CTAGTGGAAAGATTGTGGCAAG                                   |
|                                                         |               | CCD8-R              | AGCAGTTACCCTCCCATCTTC                                    |
| <i>GDSL</i>                                             | Medtr5g083040 | GDSL-F              | TACCCAACCAATACGGGCT                                      |
|                                                         |               | GDSL-R              | CAGGGCATATCATGTCAAGTTC                                   |
| <i>AMN3</i>                                             | Medtr8g022270 | AMN3-F              | GGTTATGAAACACAGGTTGGTG                                   |
|                                                         |               | AMN3-R              | GATTTCTTCAATATTGCCCTTGC                                  |
| <i>VRC2</i>                                             | Medtr7g074730 | VRC2-F              | TGGACCCTTTATTTGCCCTA                                     |
|                                                         |               | VRC2-R              | GAGAGGCTGCCAATGGATTA                                     |
| <b>Reference genes</b>                                  |               |                     |                                                          |
| <i>Actin</i>                                            | Medtr3g095530 | Actin-F             | TCAATGTGCCTGCCATGTATGT                                   |
|                                                         |               | Actin-R             | ACTCACACCGTCACCAGAATCC                                   |
| <i>PPA</i>                                              | Medtr6g084690 | PP2A-F              | CCGTTGTTGAGATCCTGCTT                                     |
|                                                         |               | PP2A-R              | TCCCCTTCCGGATAATGTT                                      |
| <i>Ubiquitin</i>                                        | Medtr1g066390 | Ubiquitin-F         | GCCGGAAAACAGCTAGAAGA                                     |
|                                                         |               | Ubiquitin-R         | GGAGACGGAGAACAAGGTGA                                     |
| <i>TIP41</i>                                            | Medtr1g107045 | TIP41-F             | GCTTTGCCACCTGTTGAAGT                                     |
|                                                         |               | TIP41-R             | AGCACCGCTTCCACAATAAG                                     |
| <i>Histone H3</i>                                       | Medtr4g097170 | HH3-F               | cctggaactgttgctcttc                                      |
|                                                         |               | HH3-R               | cctgagcaatttcacgaacc                                     |
| <b>promoter cloning</b>                                 |               |                     |                                                          |
| <i>CCD8</i>                                             | Medtr3g109610 | MtCCD8pro_attb1_F   | ggggacaagtttgtacaaaaaagcag<br>gctTCGCTCACCGGACTAAAATTG   |
|                                                         | Medtr3g109610 | MtCCD8pro_attb1_R   | ggggaccactttgtacaagaaagctg<br>ggtTTTGCTTTGAAATGGGGTTTC   |
| <i>VRC2</i>                                             | Medtr7g074730 | MtVRC2pro_attb1_F   | ggggacaagtttgtacaaaaaagcag<br>gctTCTGGCATGCATGTGTGTTTCAG |
|                                                         | Medtr7g074730 | MtVRC2pro_attb1_R   | ggggaccactttgtacaagaaagctg<br>ggtTAACCCTGTACCTCCAGTCAC   |
| <i>ARF16a</i>                                           | Medtr1g094960 | MtARF16apro_attb1_F | ggggacaagtttgtacaaaaaagcag<br>gctTCTGGTACCGTGAGATGAGGTG  |
|                                                         | Medtr1g094960 | MtARF16apro_attb1_R | ggggaccactttgtacaagaaagctg<br>ggtTGGTGTGGATGAGGAAAAAGG   |
| <i>GH3.1</i>                                            | Medtr5g016320 | MtGH3.1pro_attb1_F  | ggggacaagtttgtacaaaaaagcag<br>gctTCGTTGGCATGATGTGATTTGG  |

|                   |               |                    |                                                         |
|-------------------|---------------|--------------------|---------------------------------------------------------|
|                   | Medtr5g016320 | MtGH3.1pro_attb1_R | ggggaccactttgtacaagaaagctg<br>ggtTGCCATGATGAAATGAAAGTTC |
| <i>SAUR1</i>      | Medtr8g094980 | MtSAUR1pro_attb1_F | ggggacaagtttgtacaaaaaagcag<br>gctTCTGTCATTCATTGACAGCGTG |
|                   | Medtr8g094980 | MtSAUR1pro_attb1_R | ggggaccactttgtacaagaaagctg<br>ggtTCTTTGTTGCTTTCCAAATTG  |
| <b>genotyping</b> |               |                    |                                                         |
| <i>ARF16a</i>     | Medtr1g094960 | ARF16a_gen0_F2     | gatgaggcagggataccaaaattc                                |
|                   | Medtr1g094960 | ARF16a_gen0_R2     | ttgaatcaccagcaacaagc                                    |
| <i>Tnt1</i>       | NA            | Tnt1R              | CAGTGAACGAGCAGAACCTGTG                                  |
|                   | NA            | Tnt1F              | TCCTTGTTGGATTGGTAGCC                                    |



**Supplemental Table 2.** Details for genes in Figure 13.

| Gene name*       | IMGAG gene model | Affymetrix Probeset | notes                                  |
|------------------|------------------|---------------------|----------------------------------------|
| <i>PR4</i>       | Medtr1g080800    | Mtr.8884.1.S1_at    | Pathogen response protein              |
| <i>PR5</i>       | Medtr5g010635    | Mtr.42989.1.S1_at   | Pathogen response protein              |
| <i>NSP2</i>      | Medtr3g072710.1  | Mtr.44789.1.S1_at   | transcription factor                   |
| <i>kinesin 3</i> | Medtr2g082570.1  | Mtr.38545.1.S1_s_at | kinesin                                |
| <i>α-tubulin</i> | Medtr1g106005.1  | Mtr.28758.1.S1_s_at | α-tubulin                              |
| <i>α-tubulin</i> | Medtr1g106005.1  | Mtr.8502.1.S1_s_at  | α-tubulin                              |
| <i>SAUR2</i>     | Medtr2g066830.1  | Mtr.41652.1.S1_at   | Auxin response gene                    |
| <i>α-tubulin</i> | Medtr1g106005.1  | Mtr.37318.1.S1_at   | α-tubulin                              |
| <i>α-tubulin</i> | no match         | Mtr.34696.1.S1_s_at | α-tubulin                              |
| <i>LYK3</i>      | Medtr5g086130.1  | Mtr.142.1.S1_s_at   | Nod factor receptor                    |
| <i>RPG</i>       | Medtr1g062200.1  | Mtr.1440.1.S1_at    | unknown function                       |
| <i>NSP1</i>      | Medtr8g020840.1  | Mtr.6956.1.S1_at    | transcription factor                   |
| <i>HA1</i>       | Medtr8g006790.1  | Mtr.43470.1.S1_at   | H+ ATPase                              |
| <i>NIN</i>       | Medtr5g099060.1  | Mtr.28094.1.S1_at   | transcription factor                   |
| <i>NFYA1</i>     | Medtr1g056530.1  | Mtr.43750.1.S1_at   | transcription factor                   |
| <i>NFYA2</i>     | Medtr3g106430.1  | Mtr.1584.1.S1_at    | transcription factor                   |
| <i>ANN1</i>      | Medtr8g038210.1  | Mtr.14183.1.S1_at   | Annexin                                |
| <i>VAPYRIN</i>   | Medtr8g056020.1  | Mtr.42828.1.S1_at   | unknown function                       |
| <i>ERN1</i>      | Medtr7g085810.1  | Mtr.7556.1.S1_at    | transcription factor                   |
| <i>ENOD11</i>    | Medtr3g082100.1  | Mtr.13473.1.S1_at   | unknown function                       |
| <i>NPL</i>       | Medtr3g086320.1  | Mtr.26489.1.S1_at   | pectate lyase                          |
| <i>FLOT4</i>     | Medtr3g106430.1  | Mtr.42072.1.S1_at   | Flotillin                              |
| <i>PUB1</i>      | Medtr5g083030.1  | Mtr.26500.1.S1_at   | E3 ligase                              |
| <i>RABA1</i>     | Medtr4g079350.1  | Mtr.13500.1.S1_at   | RAB GTPase                             |
| <i>RABG1</i>     | Medtr6g039490.1  | Mtr.43764.1.S1_at   | RAB GTPase                             |
| <i>RABGAP1</i>   | Medtr1g007590.2  | Mtr.34702.1.S1_at   | RAB-GTPase activating protein          |
| <i>RABGAP1</i>   | Medtr1g007590.1  | Mtr.17571.1.S1_at   | RAB-GTPase activating protein          |
| <i>ROPGEF14</i>  | Medtr5g025960.1  | Mtr.10377.1.S1_at   | ROP-Guanine nucleotide exchange factor |

\*Note that Cell Cycle, GA, SL, and Auxin genes are found in Supplemental Data Sets **4,5,6 and 8** respectively.
